# Supplementary material for: Red seaweed (Asparagopsis taxiformis) supplementation reduces enteric methane by over 80 percent in beef steers
Source: PLoS One. 2021 Mar 17;16(3):e0247820. doi: 10.1371/journal.pone.0247820 (PMC7968649; doi:10.1371/journal.pone.0247820)
Supplement: S1 Table — Data sets used for statistical analysis of animal production, gas emissions, carcass parameters, and taste panel between Control, 0.25% OM inclusion of Asparagopsis taxiformis (Low), and 0.50% OM inclusion of Asparagopsis taxiformis (High) treatment groups. (XLSX) [file pone.0247820.s001.xlsx]

## Sheet: ProductionData
Treatment	Diet	Animal ID	Dry Matter Intake (kg)	Initial Body Weight (kg)	Final Body Weight (kg)	Total Gain (kg)	Average Daily Gain (kg)	Feed Conversion Efficiency (ADG/DMI)	Cost Per Gain (ADG/Cost Per Day)
Control	High Forage	28	11.1426	387.368	482.622	95.2543	1.51197	0.135693	2.06031
Control	High Forage	32	10.3715	334.751	445.427	110.676	1.75677	0.169384	1.65085
Control	High Forage	39	9.3681	330.215	440.891	110.676	1.75677	0.187527	1.49095
Control	High Forage	40	10.2431	362.874	459.942	97.0687	1.54077	0.150421	1.85853
Control	High Forage	48	10.5125	390.996	478.993	87.9968	1.39678	0.132868	2.10362
Control	High Forage	50	10.2703	331.122	425.469	94.3471	1.49757	0.145816	1.91698
High Dose	High Forage	26	8.96526	355.616	450.87	95.2543	1.51197	0.168648	1.65773
High Dose	High Forage	27	7.81614	378.296	460.849	82.5537	1.31038	0.16765	1.66989
High Dose	High Forage	38	8.53358	351.987	440.891	88.904	1.41118	0.165367	1.69133
High Dose	High Forage	45	8.42909	360.152	465.385	105.233	1.67037	0.198167	1.41268
High Dose	High Forage	46	7.92861	319.329	418.212	98.8831	1.56957	0.197963	1.41379
High Dose	High Forage	49	8.74888	337.472	446.335	108.862	1.72797	0.197507	1.41632
Low Dose	High Forage	31	9.12698	329.308	423.655	94.3471	1.49757	0.164082	1.70014
Low Dose	High Forage	34	9.8341	351.987	455.406	103.419	1.64157	0.166926	1.6722
Low Dose	High Forage	41	10.3255	357.43	475.364	117.934	1.87197	0.181295	1.54193
Low Dose	High Forage	42	10.129	366.502	462.664	96.1615	1.52637	0.150693	1.85234
Low Dose	High Forage	43	10.7545	376.481	480.808	104.326	1.65597	0.15398	1.81717
Low Dose	High Forage	44	9.11696	332.029	433.634	101.605	1.61277	0.176898	1.57681
Low Dose	High Forage	47	8.53395	321.143	414.583	93.44	1.48317	0.173797	1.60563
Control	Medium Forage	28	13.2295	482.622	521.631	39.0089	1.85757	0.140411	2.10096
Control	Medium Forage	32	11.9908	445.427	478.993	33.5658	1.59837	0.1333	2.20984
Control	Medium Forage	39	11.1629	440.891	452.685	11.7934	0.56159	0.0503086	5.88204
Control	Medium Forage	40	11.8511	459.942	490.787	30.8443	1.46877	0.123936	2.3801
Control	Medium Forage	48	12.942	478.993	523.445	44.452	2.11676	0.163557	1.78936
Control	Medium Forage	50	11.9669	425.469	469.921	44.452	2.11676	0.176884	1.66523
High Dose	Medium Forage	26	10.9138	450.87	479.9	29.0299	1.38238	0.126663	2.32213
High Dose	Medium Forage	27	9.35004	460.849	492.601	31.7514	1.51197	0.161708	1.82036
High Dose	Medium Forage	38	10.1952	440.891	478.086	37.1945	1.77117	0.173725	1.69617
High Dose	Medium Forage	45	10.6092	465.385	496.23	30.8443	1.46877	0.138443	2.13772
High Dose	Medium Forage	46	8.62555	418.212	437.263	19.0509	0.907184	0.105174	2.81237
High Dose	Medium Forage	49	10.2308	446.335	472.643	26.3083	1.25278	0.122451	2.41543
Low Dose	Medium Forage	31	9.92623	423.655	451.778	28.1227	1.33918	0.134913	2.16737
Low Dose	Medium Forage	34	11.7414	455.406	492.601	37.1945	1.77117	0.150848	1.94844
Low Dose	Medium Forage	41	12.1306	475.364	518.909	43.5448	2.07356	0.170936	1.72152
Low Dose	Medium Forage	42	10.8799	462.664	487.158	24.494	1.16638	0.107205	2.74489
Low Dose	Medium Forage	43	10.8573	480.808	513.466	32.6586	1.55517	0.143237	2.05477
Low Dose	Medium Forage	44	10.341	433.634	459.035	25.4012	1.20958	0.116969	2.52573
Low Dose	Medium Forage	47	9.77639	414.583	443.613	29.0299	1.38238	0.141399	2.07249
Control	Low Forage	28	11.9555	521.631	604.185	82.5537	1.31038	0.109604	2.82465
Control	Low Forage	29	11.4012	478.993	582.412	103.419	1.64157	0.143982	2.14968
Control	Low Forage	32	11.1991	478.993	579.691	100.697	1.59837	0.142723	2.16817
Control	Low Forage	39	10.436	452.685	553.382	100.697	1.59837	0.153159	2.04612
Control	Low Forage	40	11.1841	490.787	592.391	101.605	1.61277	0.144202	2.1488
Control	Low Forage	48	13.0241	523.445	638.658	115.212	1.82877	0.140414	2.21075
Control	Low Forage	50	11.0664	469.921	572.433	102.512	1.62717	0.147037	2.11354
High Dose	Low Forage	26	12.8331	479.9	612.349	132.449	2.10236	0.163824	1.89203
High Dose	Low Forage	27	10.2048	492.601	595.113	102.512	1.62717	0.159452	1.94197
High Dose	Low Forage	38	10.6744	478.086	579.691	101.605	1.61277	0.151087	2.04986
High Dose	Low Forage	45	10.1962	496.23	592.391	96.1615	1.52637	0.1497	2.06548
High Dose	Low Forage	46	9.82432	437.263	557.918	120.655	1.91517	0.194941	1.58508
High Dose	Low Forage	49	10.2827	472.643	582.412	109.769	1.74237	0.169447	1.83885
Low Dose	Low Forage	31	10.6035	451.778	557.011	105.233	1.67037	0.15753	1.95616
Low Dose	Low Forage	34	11.2384	492.601	585.134	92.5328	1.46877	0.130693	2.37334
Low Dose	Low Forage	41	11.6171	518.909	601.463	82.5537	1.31038	0.112797	2.74455
Low Dose	Low Forage	42	10.6848	487.158	579.691	92.5328	1.46877	0.137464	2.26142
Low Dose	Low Forage	43	11.7553	513.466	609.628	96.1615	1.52637	0.129845	2.39203
Low Dose	Low Forage	44	10.1665	459.035	556.104	97.0687	1.54077	0.151554	2.01346
Low Dose	Low Forage	47	9.3513	443.613	511.652	68.0388	1.07998	0.11549	2.68998

## Sheet: GasData
Treatment	Diet	Animal ID	Experimental Week	CO2 Production (g/day)	CO2 Yield (g CO2/kg DMI)	CH4 Production (g/day)	CH4 Yield (g CH4/g DMI)	H2 Production (g/day)	H2 Yield (g H2/kg DMI)
Control	High Forage	28	3	6620.5	613.41	150.5	13.94	0.5	0.05
Control	High Forage	29	3	6379	577.92	214.5	19.43	1.1	0.1
Control	High Forage	32	3	7707	756.24	231.4	22.71	1.8	0.18
Control	High Forage	39	3	6601	670.02	213	21.62	0.88	0.09
Control	High Forage	40	3	7268.6	708.39	226.8	22.1	1.11	0.11
Control	High Forage	48	3	8765.43	843.12	257.14	24.73	2.17	0.21
Control	High Forage	50	3	7147	661.31	193.43	17.9	0.95	0.09
Control	High Forage	28	6	7924.5	700.55	236.75	20.93	1.38	0.12
Control	High Forage	29	6	7833	717.37	275.4	25.22	1.71	0.16
Control	High Forage	32	6	7203.83	656.79	239.5	21.84	0.42	0.04
Control	High Forage	39	6	7204.8	796.2	234.8	25.95	1.46	0.16
Control	High Forage	40	6	7685.43	769.58	215.14	21.54	1.07	0.11
Control	High Forage	48	6	8924.88	843.92	251	23.73	1.58	0.15
Control	High Forage	50	6	6794.43	662.45	208.57	20.34	0.77	0.08
Control	High Forage	28	9	7270.33	608.28	220.17	18.42	0.95	0.08
Control	High Forage	29	9	8440.8	740.41	298.6	26.19	1.25	0.11
Control	High Forage	32	9	6816	621.29	226.25	20.62	0.71	0.07
Control	High Forage	39	9	7612.88	704.97	262.13	24.27	1.72	0.16
Control	High Forage	40	9	8791	758.07	313.29	27.02	1.67	0.14
Control	High Forage	48	9	9114.88	795.26	281.75	24.58	2.07	0.18
Control	High Forage	50	9	7558.86	698.38	254.14	23.48	1.02	0.09
High Dose	High Forage	26	3	6360.67	865.97	32.33	4.4	8.19	1.12
High Dose	High Forage	27	3	6340.8	952.32	51.4	7.72	4.9	0.74
High Dose	High Forage	38	3	6322.43	871.13	27.71	3.82	7.93	1.09
High Dose	High Forage	45	3	4928.6	679.11	77.2	10.64	2.89	0.4
High Dose	High Forage	46	3	6725.57	972.38	28.57	4.13	8.82	1.28
High Dose	High Forage	49	3	7258.67	1047.03	48.83	7.04	7.5	1.08
High Dose	High Forage	26	6	6700.83	719.98	38.67	4.15	8.83	0.95
High Dose	High Forage	27	6	6891.17	828.6	150.83	18.14	2.7	0.32
High Dose	High Forage	38	6	6822.5	731.15	164.67	17.65	3.24	0.35
High Dose	High Forage	45	6	6363.2	711.38	101.2	11.31	3.14	0.35
High Dose	High Forage	46	6	6544.43	815.85	129	16.08	4.65	0.58
High Dose	High Forage	49	6	9129.25	904.37	140.63	13.93	6.33	0.63
High Dose	High Forage	26	9	8275	742.36	35.88	3.22	10.21	0.92
High Dose	High Forage	27	9	7667.25	780.04	136.63	13.9	3.87	0.39
High Dose	High Forage	38	9	6829.25	644.32	147.75	13.94	3.65	0.34
High Dose	High Forage	45	9	7704.63	702.17	146.63	13.36	3.8	0.35
High Dose	High Forage	46	9	7895.38	744.68	156.38	14.75	6.2	0.58
High Dose	High Forage	49	9	10086	946.91	194.13	18.23	6.17	0.58
Low Dose	High Forage	31	3	8265.57	902.82	157.29	17.18	3.68	0.4
Low Dose	High Forage	34	3	7343.67	760.02	181.67	18.8	4.3	0.45
Low Dose	High Forage	41	3	7241.71	770.81	92.57	9.85	5.7	0.61
Low Dose	High Forage	42	3	6792.8	685.06	110.4	11.13	4.41	0.44
Low Dose	High Forage	43	3	7634.25	743.52	44.75	4.36	5.53	0.54
Low Dose	High Forage	44	3	7059.5	839.51	80.5	9.57	4.85	0.58
Low Dose	High Forage	47	3	6702.43	801.02	156.71	18.73	2.01	0.24
Low Dose	High Forage	31	6	7295.14	752.9	174.86	18.05	2.47	0.25
Low Dose	High Forage	34	6	8037.43	738.35	190.86	17.53	3.91	0.36
Low Dose	High Forage	41	6	7843.83	686.29	189.83	16.61	3.02	0.26
Low Dose	High Forage	42	6	7376.67	733.99	155	15.42	2.52	0.25
Low Dose	High Forage	43	6	8197.13	699.9	157.75	13.47	3.48	0.3
Low Dose	High Forage	44	6	6909	700.44	114.67	11.62	2.71	0.28
Low Dose	High Forage	47	6	6683	744.61	156	17.38	2.04	0.23
Low Dose	High Forage	31	9	7342	765.3	152.38	15.88	3.38	0.35
Low Dose	High Forage	34	9	8412	743.41	224.14	19.81	4.32	0.38
Low Dose	High Forage	41	9	7429.33	657.99	179.5	15.9	1.75	0.16
Low Dose	High Forage	42	9	7446	678.64	191.25	17.43	1.78	0.16
Low Dose	High Forage	43	9	8203.75	731.91	193.63	17.27	2.82	0.25
Low Dose	High Forage	44	9	7204.13	657.33	94.5	8.62	4.16	0.38
Low Dose	High Forage	47	9	7685.38	767.63	192.13	19.19	3.51	0.35
Control	Medium Forage	28	12	9640.43	703.7	256.29	18.71	1.68	0.12
Control	Medium Forage	29	12	9342	747.9	260.75	20.88	1.46	0.12
Control	Medium Forage	32	12	7856.4	629.81	238	19.08	0.86	0.07
Control	Medium Forage	39	12	7691.43	642.64	191.71	16.02	0.96	0.08
Control	Medium Forage	40	12	9093	752.76	238	19.7	1.76	0.15
Control	Medium Forage	48	12	11200.8	784.75	365.33	25.6	2.39	0.17
Control	Medium Forage	50	12	8326.86	652.36	250.43	19.62	0.77	0.06
High Dose	Medium Forage	26	12	7816.43	703.59	27.71	2.49	9.79	0.88
High Dose	Medium Forage	27	12	8050.43	846.56	61.71	6.49	6.15	0.65
High Dose	Medium Forage	38	12	7159.38	689.34	36.38	3.5	8.47	0.82
High Dose	Medium Forage	45	12	8281.29	748.45	33.57	3.03	8.97	0.81
High Dose	Medium Forage	46	12	7471	919.56	53.17	6.54	10.05	1.24
High Dose	Medium Forage	49	12	9465.57	949.82	53.86	5.4	9.66	0.97
Low Dose	Medium Forage	31	12	8186	817.81	111.43	11.13	5.16	0.52
Low Dose	Medium Forage	34	12	8790.14	720.92	234.86	19.26	4.47	0.37
Low Dose	Medium Forage	41	12	8675.57	689.81	113.14	9	5.61	0.45
Low Dose	Medium Forage	42	12	8792.75	805.37	56.75	5.2	7.75	0.71
Low Dose	Medium Forage	43	12	9045.5	756.82	105.17	8.8	6.55	0.55
Low Dose	Medium Forage	44	12	8251.29	776.11	120.29	11.31	5.43	0.51
Low Dose	Medium Forage	47	12	8835.86	859.98	122.14	11.89	5.93	0.58
Control	Low Forage	28	15	9245.5	737	237	18.89	1.2	0.1
Control	Low Forage	29	15	7905.33	665.13	211	17.75	1.33	0.11
Control	Low Forage	32	15	7602	649.96	150	12.82	0.18	0.02
Control	Low Forage	39	15	7247	669.67	122	11.27	1.46	0.14
Control	Low Forage	40	15	8824	794.81	119	10.72	0.97	0.09
Control	Low Forage	48	15	10856.4	809.11	168	12.52	1.74	0.13
Control	Low Forage	50	15	8149	685.53	155	13.04	0.69	0.06
Control	Low Forage	28	18	8429.5	734.79	147	12.81	0.82	0.07
Control	Low Forage	32	18	7680	684.66	163	14.53	0.42	0.04
Control	Low Forage	39	18	6425.25	633.56	116.25	11.46	0.66	0.06
Control	Low Forage	40	18	7218.71	667.07	130.71	12.08	0.98	0.09
Control	Low Forage	48	18	8037.5	726.21	144.75	13.08	0.98	0.09
Control	Low Forage	50	18	6565.38	720.98	98.75	10.84	0.65	0.07
Control	Low Forage	28	21	7100.4	668	111.56	10.5	0.94	0.09
Control	Low Forage	29	21	5613	541.81	112	10.81	1.31	0.13
Control	Low Forage	32	21	5869.42	593.64	99.41	10.05	0.58	0.06
Control	Low Forage	39	21	6491.63	660.59	118.08	12.02	1.7	0.17
Control	Low Forage	40	21	7722.19	671.7	148.83	12.95	0.77	0.07
Control	Low Forage	48	21	8194.66	682.27	131.44	10.94	1.21	0.1
Control	Low Forage	50	21	6599.63	607.12	112.24	10.33	0.44	0.04
High Dose	Low Forage	26	15	9420.57	718	22	1.68	8.21	0.63
High Dose	Low Forage	27	15	8708.25	775.84	29	2.58	4.72	0.42
High Dose	Low Forage	38	15	8905.71	795.96	25	2.23	9.26	0.83
High Dose	Low Forage	45	15	8245.88	771.4	25	2.34	6.41	0.6
High Dose	Low Forage	46	15	7964.5	877.62	37	4.08	8.78	0.97
High Dose	Low Forage	49	15	9463.75	954.89	35	3.53	8.15	0.82
High Dose	Low Forage	26	18	8407.33	670.34	18.25	1.46	7.46	0.6
High Dose	Low Forage	27	18	7342.2	846.98	17.8	2.05	3.95	0.46
High Dose	Low Forage	38	18	7130	679.15	22.14	2.11	7.69	0.73
High Dose	Low Forage	45	18	6410.33	667.39	21	2.19	4.35	0.45
High Dose	Low Forage	46	18	7594.5	732.73	27.5	2.65	6.59	0.64
High Dose	Low Forage	49	18	8720.71	802.16	27.71	2.55	7.92	0.73
High Dose	Low Forage	26	21	7277.6	607.23	20.82	1.74	7.7	0.64
High Dose	Low Forage	27	21	6928.22	651.21	28.02	2.63	5.83	0.55
High Dose	Low Forage	38	21	6555.79	622.14	25.07	2.38	5.72	0.54
High Dose	Low Forage	45	21	6685.42	649.61	33.04	3.21	6.46	0.63
High Dose	Low Forage	46	21	7666.5	685.05	28.07	2.51	5.91	0.53
High Dose	Low Forage	49	21	8532.92	846.87	39.69	3.94	9.07	0.9
Low Dose	Low Forage	31	15	8558.71	818.43	24	2.3	6.81	0.65
Low Dose	Low Forage	34	15	6933.88	664.23	99	9.48	3.02	0.29
Low Dose	Low Forage	41	15	8963.14	697.02	42	3.27	7.26	0.56
Low Dose	Low Forage	42	15	7362	677.67	22	2.03	4.43	0.41
Low Dose	Low Forage	43	15	8923.86	730.79	28	2.29	6.94	0.57
Low Dose	Low Forage	44	15	8177.5	742.22	26	2.36	6.26	0.57
Low Dose	Low Forage	47	15	8838.29	859.84	29	2.82	6.39	0.62
Low Dose	Low Forage	31	18	7368.63	708.34	24.88	2.39	5.96	0.57
Low Dose	Low Forage	34	18	7896.13	695.16	27	2.38	5.88	0.52
Low Dose	Low Forage	41	18	7051.29	692.86	26.71	2.62	4.31	0.42
Low Dose	Low Forage	42	18	9064	797.73	26	2.29	9.37	0.82
Low Dose	Low Forage	43	18	8464.86	768.63	34.14	3.1	6.06	0.55
Low Dose	Low Forage	44	18	7183.38	712.51	26.75	2.65	5.72	0.57
Low Dose	Low Forage	47	18	6766.43	800.46	41	4.85	4.56	0.54
Low Dose	Low Forage	31	21	7205.85	687.25	38.49	3.67	5.81	0.55
Low Dose	Low Forage	34	21	7270.58	667.74	35.46	3.26	5.48	0.5
Low Dose	Low Forage	41	21	6233.87	626.91	46.12	4.64	3.42	0.34
Low Dose	Low Forage	43	21	8436.74	741.71	39.59	3.48	6.74	0.59
Low Dose	Low Forage	47	21	6694.84	788.11	105.65	12.44	3.29	0.39

## Sheet: CarcassData
Treatment	Animal ID	Moisture	Protein	Fat	Ash	Carbohydrates	Calories	Iodine (PPM)	Slice Shear Force (kgf)	Warner- Bratzler (kgf)	Hot Carcass Weight (kg)	Rib Eye Area (inches)
Control	28	46.9	12.8	39.9	0.7	0	410	0	14.81	2.374	382.7	10.9
Control	29	55.3	16.5	27.2	0.8	0.2	312	0	17.19	3.132	358.2	10.8
Control	32	53.1	16.1	30.2	0.7	0	336	0	17.4	3.128	358.6	10.9
Control	39	54	16.2	29.1	0.8	0	327	0	12.53	2.752	347.3	10.7
Control	40	57.8	16.6	23.7	0.8	1.1	284	0	15.77	2.546	364.5	11.4
Control	48	53.6	16.1	29.5	0.6	0.2	331	0	25.4	3.458	409.1	11.3
Control	50	56.4	18.7	24	0.7	0.2	292	0	16.51	2.297	366.8	12.8
High Dose	26	62.3	19.8	15.8	1.2	0.9	225	0.16	27.39	3.142	364.5	11.6
High Dose	27	57.3	18.4	23	0.9	0.4	282	0.15	11.37	2.727	367.3	12.5
High Dose	38	53.8	16.1	29.2	0.8	0.1	328	0.16	13.75	2.142	348.2	10.5
High Dose	45	51.4	16	32.2	0.8	0	354	0.13	9.84	2.148	350.9	9.7
High Dose	46	53.1	16.6	28.9	0.8	0.6	329	0.14	20.38	2.864	330	10.1
High Dose	49	53.7	16.4	28.6	0.8	0.5	325	0.17	14.93	1.946	340	10
Low Dose	31	56.6	17.1	24.6	0.8	0.9	293	0	17.43	2.564	414.5	10.7
Low Dose	34	48.3	15.4	32.6	0.8	2.9	367	0.13	14.34	2.826	370.9	12.8
Low Dose	41	59.5	19.6	21.7	1	0	274	0.11	16.1	2.835	372.3	11.7
Low Dose	42	54.2	15.9	25.8	0.8	3.3	309	0	16.04	2.122	364.1	12.6
Low Dose	43	56.8	16.4	26	0.8	0	300	0.12	24.22	2.39	353.6	10.6
Low Dose	44	51	15.8	32.9	0.8	0	359	0.11	13.6	2.82	349.1	10.4
Low Dose	47	61.4	19.7	19	1	0	250	0.11	15.58	3.096	305.5	9.9

## Sheet: TastePanelData
Participant ID	Session	Sample 1	Treatment	Tenderness	Flavor	Juciness	Overall	Sample 2	Treatment	Tenderness	Flavor	Juciness	Overall	Sample 3	Treatment	Tenderness	Flavor	Juciness	Overall
1	1	527	Low Dose	8	6	5	7	348	Control	8	5	4	5	215	High Dose	5	5	4	4
2	1	744	High Dose	3	6	5	6	901	Low Dose	7	6	7	7	424	Control	6	6	5	6
3	1	338	Control	8	8	8	8	103	Low Dose	9	9	9	9	114	High Dose	8	9	8	8
4	1	527	Low Dose	7	7	6	6	348	Control	8	9	7	8	215	High Dose	9	8	9	9
5	1	744	High Dose	7	6	6	4	901	Low Dose	4	4	3	4	424	Control	7	6	8	7
6	1	338	Control	7	8	5	7	103	Low Dose	6	6	4	6	114	High Dose	6	4	4	5
7	1	527	Low Dose	6	4	3	4	348	Control	6	4	6	5	215	High Dose	8	7	8	7
8	1	744	High Dose	6	7	3	4	901	Low Dose	8	3	7	7	424	Control	5	4	2	3
9	1	338	Control	8	7	6	7	103	Low Dose	7	7	7	7	114	High Dose	8	7	6	7
10	1	527	Low Dose	7	8	8	7	348	Control	9	7	7	8	215	High Dose	9	8	9	9
11	1	744	High Dose	3	3	4	4	901	Low Dose	6	6	6	6	424	Control	5	5	4	5
12	1	338	Control	7	7	8	7	103	Low Dose	9	8	9	9	114	High Dose	8	8	8	8
13	1	527	Low Dose	8	9	9	8	348	Control	8	7	7	7	215	High Dose	4	6	6	5
14	1	744	High Dose	8	8	4	8	907	Low Dose	9	9	9	9	424	Control	8	8	5	8
15	1	338	Control	7	4	6	5	103	Low Dose	7	6	4	4	114	High Dose	8	6	3	6
16	1	527	Low Dose	7	6	7	7	348	Control	8	8	8	8	215	High Dose	9	9	8	8
17	1	744	High Dose	7	5	5	6	901	Low Dose	8	7	7	7	424	Control	5	6	3	5
18	1	338	Control	7	7	7	7	103	Low Dose	6	6	6	6	114	High Dose	5	5	5	5
19	1	527	Low Dose	6	8	9	9	348	Control	6	8	8	9	215	High Dose	6	7	6	8
20	1	744	High Dose	3	5	3	5	901	Low Dose	7	5	6	7	424	Control	3	5	3	5
21	1	338	Control	9	7	8	8	103	Low Dose	4	7	6	6	114	High Dose	5	6	4	5
22	1	527	Low Dose	7	6	8	7	348	Control	4	3	7	4	215	High Dose	3	3	7	3
23	1	744	High Dose	2	4	2	2	901	Low Dose	5	5	4	5	424	Control	2	2	1	2
24	1	338	Control	8	8	8	8	103	Low Dose	9	8	8	8	114	High Dose	8	8	7	8
25	2	469	Control	7	7	6	6	568	Low Dose	8	6	7	7	703	High Dose	2	2	1	2
26	2	106	Low Dose	4	6	4	5	900	Control	7	8	9	8	556	High Dose	4	6	4	5
27	2	802	High Dose	7	7	7	7	515	Low Dose	7	8	8	8	667	Control	7	6	7	7
28	2	469	Control	7	5	7	6	568	Low Dose	7	7	6	7	703	High Dose	6	7	6	7
29	2	106	Low Dose	5	6	6	6	900	Control	6	7	6	6	556	High Dose	5	4	4	4
30	2	802	High Dose	4	5	4	5	515	Low Dose	6	6	4	6	667	Control	8	7	8	8
31	2	469	Control	8	7	8	7	568	Low Dose	6	6	4	6	703	High Dose	7	6	6	7
32	2	106	Low Dose	7	6	5	6	900	Control	7	7	7	7	556	High Dose	5	6	5	6
33	2	802	High Dose	8	7	8	8	515	Low Dose	8	9	9	9	667	Control	7	8	9	8
34	2	469	Control	7	4	6	6	568	Low Dose	4	3	6	3	703	High Dose	7	6	6	6
35	2	106	Low Dose	9	9	9	9	900	Control	7	7	9	7	556	High Dose	7	7	7	6
36	2	802	High Dose	6	7	4	6	515	Low Dose	5	7	5	6	667	Control	7	7	6	8
37	2	469	Control	8	3	7	6	568	Low Dose	9	7	7	7	703	High Dose	6	6	7	6
38	2	106	Low Dose	7	6	5	6	900	Control	6	8	8	8	556	High Dose	3	3	3	3
39	2	802	High Dose	7	8	7	8	515	Low Dose	6	7	6	7	667	Control	7	8	8	8
40	2	469	Control	7	7	7	7	568	Low Dose	7	3	6	4	703	High Dose	6	5	6	6
41	2	106	Low Dose	7	8	6	7	900	Control	9	8	9	8	556	High Dose	7	7	9	7
42	2	802	High Dose	7	6	7	7	515	Low Dose	4	4	3	3	667	Control	8	8	8	8
43	2	469	Control	5	6	7	6	568	Low Dose	4	6	5	5	703	High Dose	6	7	7	7
44	2	106	Low Dose	5	4	6	4	900	Control	6	4	4	4	556	High Dose	7	4	4	5
45	2	802	High Dose	7	7	7	7	515	Low Dose	7	7	7	7	667	Control	8	7	8	8
46	2	469	Control	8	7	8	7	568	Low Dose	7	7	6	6	703	High Dose	8	6	7	7
47	2	106	Low Dose	7	6	7	7	900	Control	8	9	7	8	556	High Dose	3	5	2	3
48	2	802	High Dose	7	8	6	7	515	Low Dose	7	6	6	6	667	Control	5	6	5	5
49	3	901	Low Dose	9	8	8	8	114	High Dose	5	6	6	6	667	Control	7	7	8	7
50	3	338	Control	9	8	8	9	269	Low Dose	9	8	9	8	703	High Dose	8	8	8	8
51	3	768	High Dose	7	6	7	7	269	Low Dose	7	7	7	7	116	Control	7	7	6	6
52	3	901	Low Dose	7	6	8	6	667	Control	4	4	3	4	114	High Dose	6	7	7	7
53	3	338	Control	8	7	6	7	269	Low Dose	8	8	8	8	703	High Dose	8	7	8	8
54	3	768	High Dose	6	7	7	7	269	Low Dose	9	8	9	9	116	Control	9	8	8	8
55	3	901	Low Dose	4	7	8	7	667	Control	6	7	5	6	114	High Dose	7	8	7	8
56	3	338	Control	7	8	6	7	269	Low Dose	8	9	9	9	703	High Dose	8	9	8	8
57	3	768	High Dose	4	7	5	6	269	Low Dose	8	8	7	8	116	Control	4	3	3	3
58	3	901	Low Dose	6	3	3	3	667	Control	7	6	6	7	114	High Dose	7	7	6	7
59	3	338	Control	8	7	8	8	269	Low Dose	4	4	5	4	703	High Dose	6	5	6	6
60	3	768	High Dose	6	4	2	4	269	Low Dose	7	6	7	6	116	Control	7	7	8	7
61	3	901	Low Dose	7	6	6	6	667	Control	8	7	7	7	114	High Dose	6	4	6	5
62	3	338	Control	8	7	7	8	269	Low Dose	7	8	7	8	703	High Dose	5	5	4	4
63	3	768	High Dose	8	8	7	7	269	Low Dose	7	7	8	7	116	Control	4	7	4	6
64	3	901	Low Dose	7	6	7	7	667	Control	6	7	5	6	114	High Dose	8	8	7	8
65	3	338	Control	7	9	7	8	269	Low Dose	9	9	8	9	703	High Dose	4	6	4	7
66	3	768	High Dose	8	9	8	9	269	Low Dose	9	8	8	9	116	Control	7	8	7	8
67	3	901	Low Dose	8	8	9	8	667	Control	4	5	5	5	114	High Dose	6	4	5	5
68	3	338	Control	3	3	4	3	269	Low Dose	6	2	6	5	703	High Dose	7	5	7	7
69	3	768	High Dose	7	8	7	7	269	Low Dose	8	7	8	8	116	Control	8	7	6	7
70	3	901	Low Dose	8	6	7	7	667	Control	3	5	4	4	114	High Dose	4	6	5	6
71	3	338	Control	7	7	7	7	269	Low Dose	7	8	8	8	703	High Dose	7	6	7	7
72	3	768	High Dose	9	8	9	9	269	Low Dose	4	7	6	7	116	Control	5	7	6	6
73	4	556	High Dose	7	4	4	5	103	Low Dose	4	3	4	4	469	Control	7	7	6	7
74	4	900	Control	9	8	9	9	568	Low Dose	8	8	7	8	802	High Dose	9	8	7	9
75	4	106	Low Dose	7	3	7	4	424	Control	6	7	5	6	768	High Dose	7	4	7	6
76	4	556	High Dose	9	8	8	9	103	Low Dose	7	6	8	7	469	Control	8	8	9	8
77	4	900	Control	7	7	4	6	568	Low Dose	8	4	6	7	802	High Dose	8	6	7	6
78	4	106	Low Dose	7	4	4	4	424	Control	3	6	3	4	768	High Dose	6	7	8	7
79	4	556	High Dose	6	6	4	5	103	Low Dose	5	5	4	5	469	Control	7	7	6	7
80	4	900	Control	7	7	7	7	568	Low Dose	4	6	4	4	802	High Dose	8	5	6	7
81	4	106	Low Dose	7	8	8	8	424	Control	7	7	6	7	768	High Dose	9	8	9	9
82	4	556	High Dose	8	7	8	8	103	Low Dose	5	6	5	5	469	Control	8	6	8	7
83	4	900	Control	8	9	7	8	568	Low Dose	7	8	4	7	802	High Dose	8	7	6	7
85	4	106	Low Dose	7	8	7	8	424	Control	8	8	7	8	768	High Dose	8	8	9	9
86	4	556	High Dose	8	8	4	8	103	Low Dose	8	8	4	8	469	Control	7	8	6	8
87	4	900	Control	8	8	7	8	568	Low Dose	7	8	7	7	802	High Dose	7	6	6	6
88	4	106	Low Dose	7	7	8	8	424	Control	8	8	7	8	768	High Dose	8	8	8	9
89	4	556	High Dose	6	4	7	6	103	Low Dose	8	8	9	9	469	Control	7	6	6	7
90	4	900	Control	6	5	6	5	568	Low Dose	8	6	8	8	802	High Dose	7	7	7	7
91	4	106	Low Dose	8	6	7	7	424	Control	8	7	8	8	768	High Dose	8	4	6	5
92	4	556	High Dose	7	7	8	7	103	Low Dose	6	7	7	6	469	Control	7	7	8	7
93	4	900	Control	3	5	2	3	568	Low Dose	1	3	2	1	802	High Dose	4	6	3	6
94	4	106	Low Dose	6	6	4	5	424	Control	6	8	4	7	768	High Dose	7	3	7	5
95	4	556	High Dose	6	5	7	6	103	Low Dose	3	3	2	2	469	Control	6	5	7	6
96	4	900	Control	8	6	7	5	568	Low Dose	7	7	7	6	802	High Dose	7	5	6	4
97	4	106	Low Dose	7	8	8	7	424	Control	7	4	6	7	768	High Dose	3	3	7	4
98	4	556	High Dose	7	7	7	7	103	Low Dose	5	6	4	5	469	Control	7	6	6	6
99	5	515	Low Dose	3	3	3	3	348	Control	3	3	3	3	744	High Dose	4	5	4	5
100	5	116	Control	7	7	6	7	527	Low Dose	7	7	6	7	215	High Dose	8	8	8	8
101	5	515	Low Dose	4	6	4	6	348	Control	7	7	5	7	744	High Dose	7	4	5	6
102	5	116	Control	4	6	3	5	527	Low Dose	7	5	4	5	215	High Dose	6	7	5	7
103	5	116	Control	8	7	8	8	527	Low Dose	8	7	7	7	215	High Dose	7	7	8	7
104	5	515	Low Dose	7	6	6	6	348	Control	5	5	6	5	744	High Dose	7	7	7	7
105	5	515	Low Dose	7	7	6	7	348	Control	8	8	7	8	744	High Dose	7	6	6	7
106	5	116	Control	8	8	7	8	527	Low Dose	8	7	7	7	215	High Dose	8	9	8	8
107	5	515	Low Dose	7	7	9	7	348	Control	7	8	8	7	744	High Dose	4	7	5	4
108	5	116	Control	4	8	7	7	527	Low Dose	8	7	8	8	215	High Dose	7	8	8	8
109	5	116	Control	6	7	6	7	527	Low Dose	7	8	8	9	215	High Dose	6	6	6	6
110	5	515	Low Dose	9	7	7	8	348	Control	9	8	9	9	744	High Dose	8	4	4	4
111	5	515	Low Dose	7	6	6	7	348	Control	6	6	6	7	744	High Dose	5	5	4	5
112	5	116	Control	6	6	5	6	527	Low Dose	6	6	7	7	215	High Dose	7	7	7	8
113	5	116	Control	7	5	7	5	527	Low Dose	7	5	5	5	215	High Dose	7	7	7	7
114	5	515	Low Dose	8	7	7	8	348	Control	8	7	8	8	744	High Dose	7	5	5	5
116	5	515	Low Dose	7	6	6	6	348	Control	8	7	8	8	744	High Dose	7	8	7	7
117	5	116	Control	3	7	3	5	527	Low Dose	6	5	3	3	215	High Dose	4	6	6	6
118	5	515	Low Dose	6	6	7	6	348	Control	7	7	6	7	744	High Dose	7	7	7	7
